# Supplementary material for: Structural confinement toward suppressing concentration and thermal quenching for improving near-infrared luminescence of Fe3+
Source: Royal Society of Chemistry journal article supplement (doi:10.1039/d3qi01649h), 2023-01-01
Supplement: d3qi01649h1.pdf [file d3qi01649h1.pdf]

## Supporting Information

### Structural confinement toward suppressing concentration and thermal quenching for improving near-infrared luminescence of Fe<sup>3+</sup>

Fangyi Zhao, Yuhe Shao, Zhen Song\* and Quanlin Liu\*

The Beijing Municipal Key Laboratory of New Energy Materials and Technologies, School of Materials Sciences and Engineering, University of Science and Technology Beijing, Beijing 100083, China. E-mail: [zsong@ustb.edu.cn](mailto:zsong@ustb.edu.cn); [qliu@ustb.edu.cn](mailto:qliu@ustb.edu.cn)

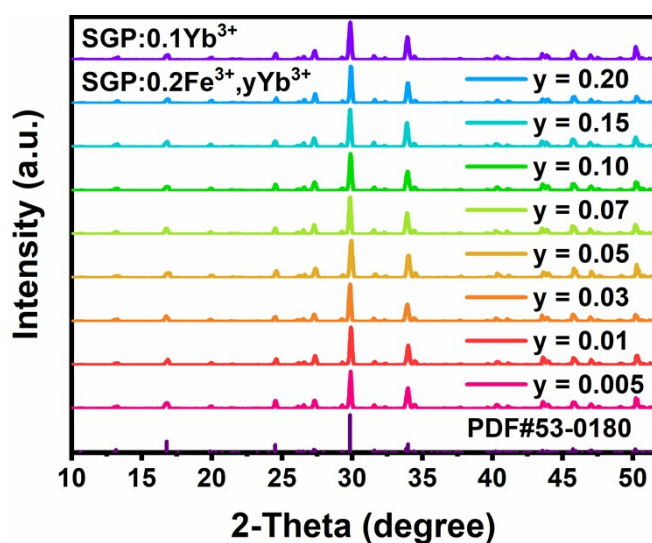

Fig. S1 XRD patterns of SGP:0.2Fe<sup>3+</sup>,yYb<sup>3+</sup> (0.005 ≤ y ≤ 0.20) and SGP:0.1Yb<sup>3+</sup>.

Table S1. Main parameters of processing and refinement of SGP:0.2Fe<sup>3+</sup> and Sr<sub>9</sub>Fe(PO<sub>4</sub>)<sub>7</sub> samples

| Compound                   | SGP:0.2Fe <sup>3+</sup> | Sr <sub>9</sub> Fe(PO <sub>4</sub> ) <sub>7</sub> |
|----------------------------|-------------------------|---------------------------------------------------|
| Space Group                | <i>I</i> 12/ <i>a</i> 1 | <i>I</i> 12/ <i>a</i> 1                           |
| Symmetry                   | Monoclinic              | Monoclinic                                        |
| <i>a</i> (Å)               | 17.9674(9)              | 17.9749(8)                                        |
| <i>b</i> (Å)               | 10.5955(5)              | 10.6087(5)                                        |
| <i>c</i> (Å)               | 18.2615(8)              | 18.2795(8)                                        |
| $\alpha = \gamma$ (°)      | 90.00                   | 90.00                                             |
| $\beta$ (°)                | 132.778(2)              | 132.843(2)                                        |
| <i>V</i> (Å <sup>3</sup> ) | 2551.7(2)               | 2555.8(2)                                         |
| <i>R<sub>p</sub></i> (%)   | 12.6                    | 14.8                                              |
| <i>R<sub>wp</sub></i> (%)  | 16.0                    | 19.4                                              |
| <i>R<sub>exp</sub></i> (%) | 10.03                   | 11.20                                             |
| $\chi^2$                   | 2.54                    | 3.01                                              |

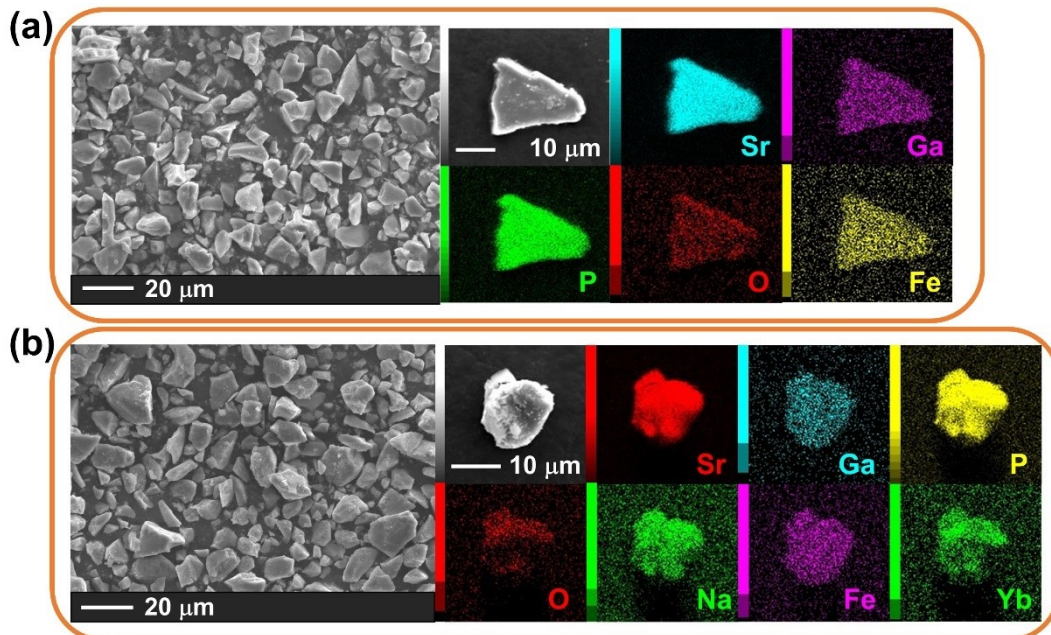

Fig. S2 SEM images and element mapping images of SGP:0.2Fe<sup>3+</sup> and SGP:0.2Fe<sup>3+</sup>,0.07Yb<sup>3+</sup>.

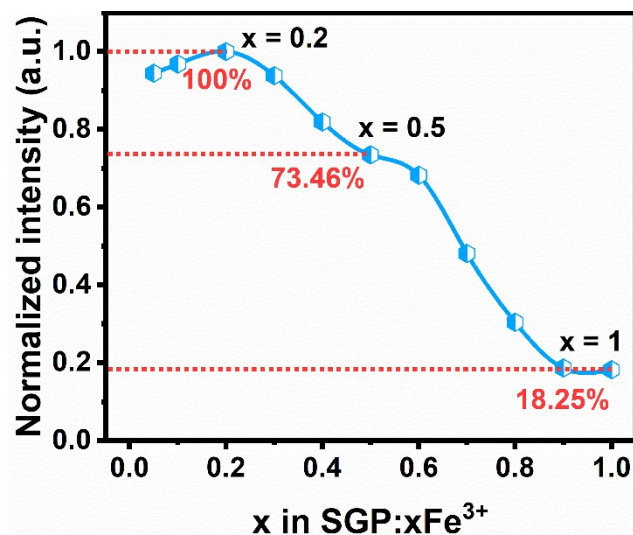

Fig. S3 Relationship between integrated PL intensity and Fe<sup>3+</sup> concentration in SGP:xFe<sup>3+</sup>.

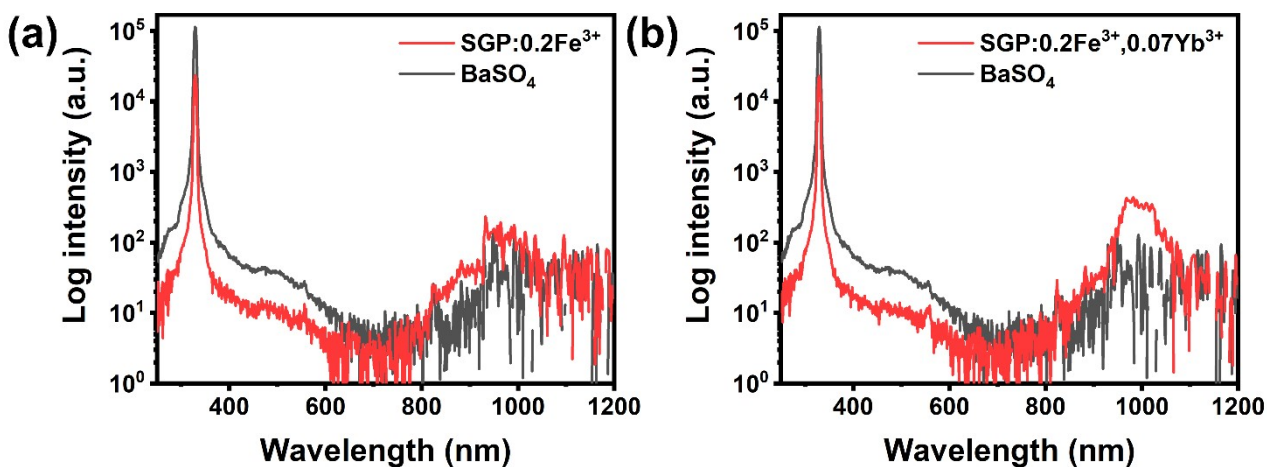

Fig. S4 (a) Spectra of SGP:0.2Fe<sup>3+</sup> and BaSO<sub>4</sub> to determine the IQE and EQE values. (b) Spectra of SGP:0.2Fe<sup>3+</sup>,0.07Yb<sup>3+</sup> and BaSO<sub>4</sub> to determine the IQE and EQE values.

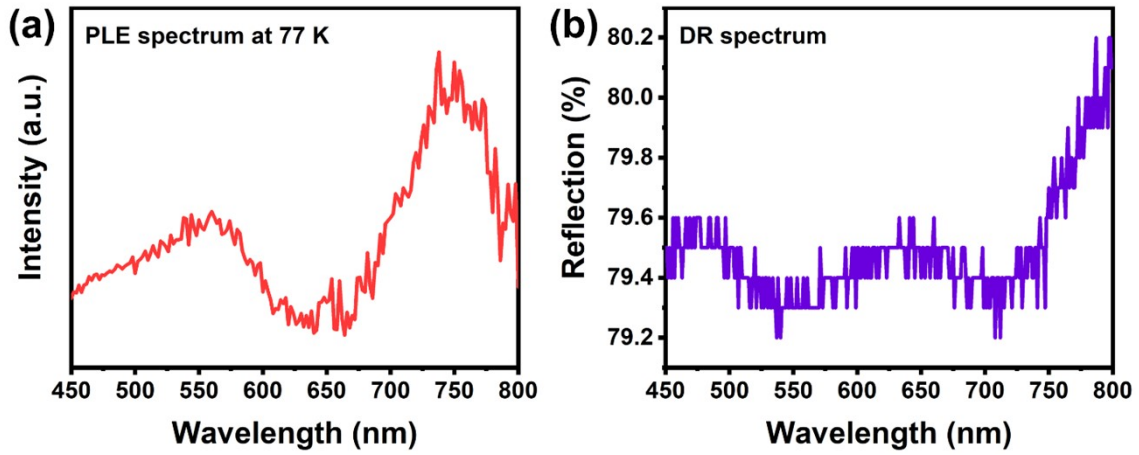

Fig. S5 Magnified (a) PLE spectrum measured at 77 K and (b) DR spectrum ranging from 450 to 800 nm of SGP:0.2Fe<sup>3+</sup>.

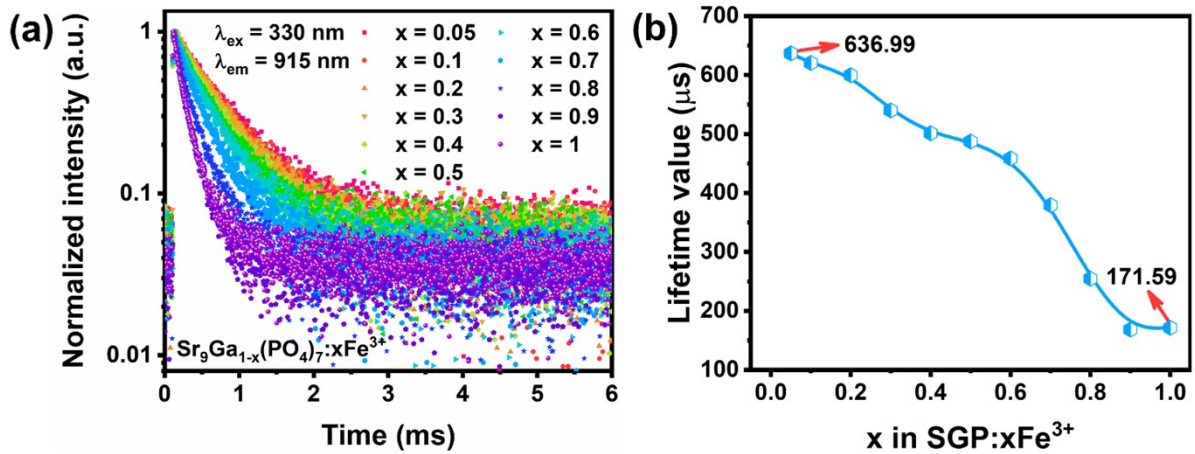

Fig. S6 (a) Luminescence decay curves of SGP:xFe<sup>3+</sup> ( $0.05 \leq x \leq 1$ ) excited by 330 nm and monitoring at 915 nm. (b) Relationship between lifetime values and Fe<sup>3+</sup> concentration in SGP:xFe<sup>3+</sup>.

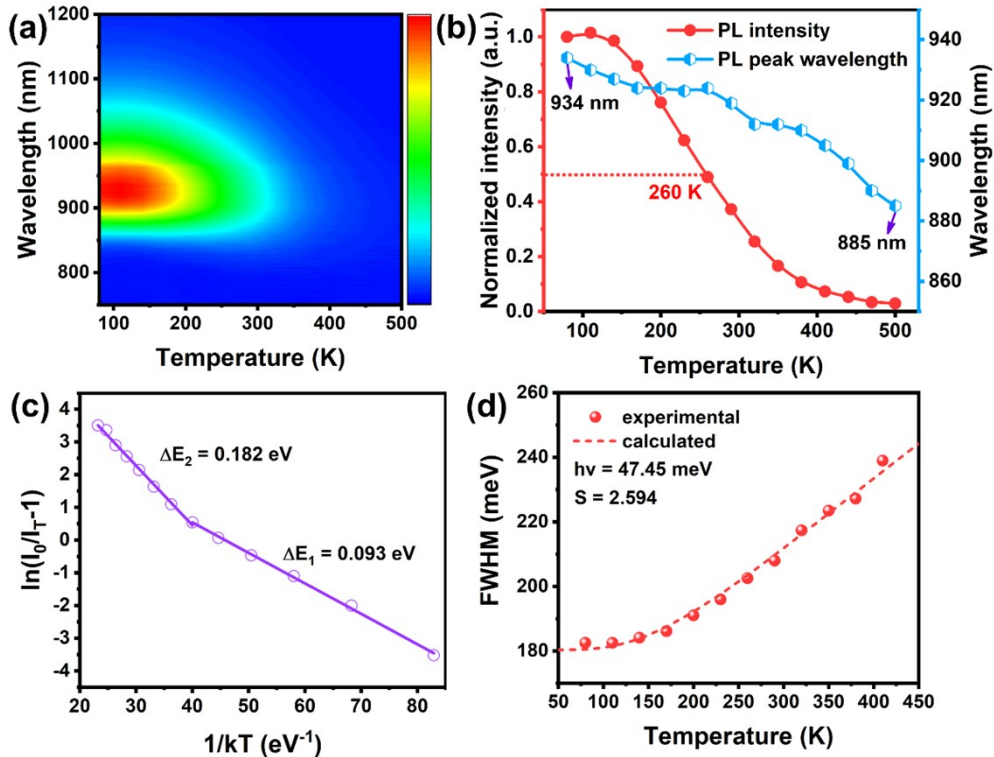

Fig. S7 (a) Temperature-dependent PL spectra at 80-500 K, (b) dependence of PL intensity and PL peak wavelength on temperature, (c) activation energy plots using the Arrhenius equation, (d) fitting of the FWHM as a function of temperature for SGP:0.2Fe<sup>3+</sup>.

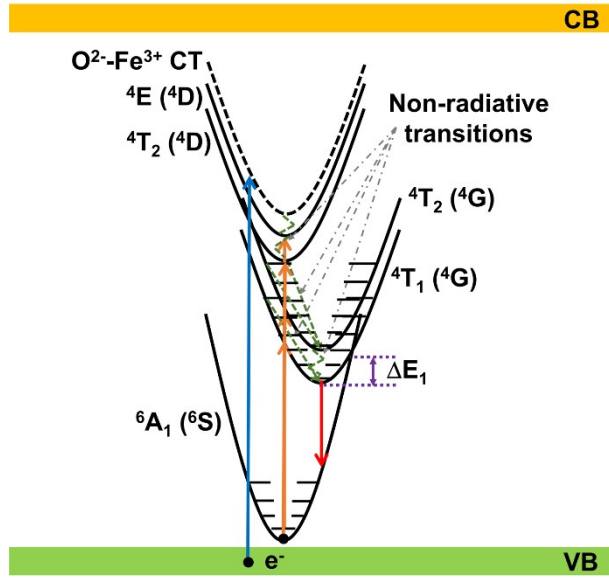

Fig. S8 Configurational coordinate diagram to illustrate thermal quenching behavior.

The temperature-dependence of PL intensity can be described by a modified Arrhenius equation:<sup>1</sup>

$$I_T = \frac{I_0}{1 + A \exp(-\Delta E / kT)} \quad (S1)$$

where  $I_0$  is the initial intensity,  $I_T$  is the intensity at a given temperature,  $A$  is a constant,  $k$  is the Boltzmann constant and  $\Delta E$  is the activation energy for the thermal quenching.

The widening of FWHM can be explained qualitatively based on the following Equation:<sup>2</sup>

$$FWHM = 2.36 \times hv \times \sqrt{S} \times \sqrt{\coth\left(\frac{hv}{2kT}\right)} \quad (S2)$$

where  $hv$ ,  $S$ ,  $k$  and  $T$  represent the energy of lattice vibration, Huang-Rhys parameter, Boltzmann constant and Kelvin temperature, respectively.

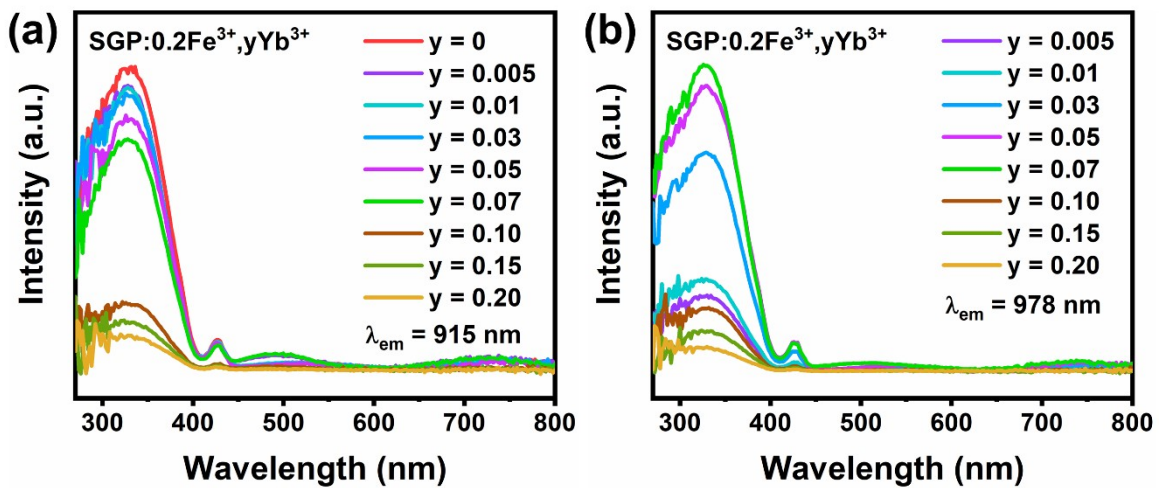

Fig. S9 (a) PLE spectra of SGP:0.2Fe<sup>3+</sup>,yYb<sup>3+</sup> (0 ≤ y ≤ 0.20) monitoring at 915 nm. (b) PLE spectra of SGP:0.2Fe<sup>3+</sup>,yYb<sup>3+</sup> (0.005 ≤ y ≤ 0.20) monitoring at 978 nm.

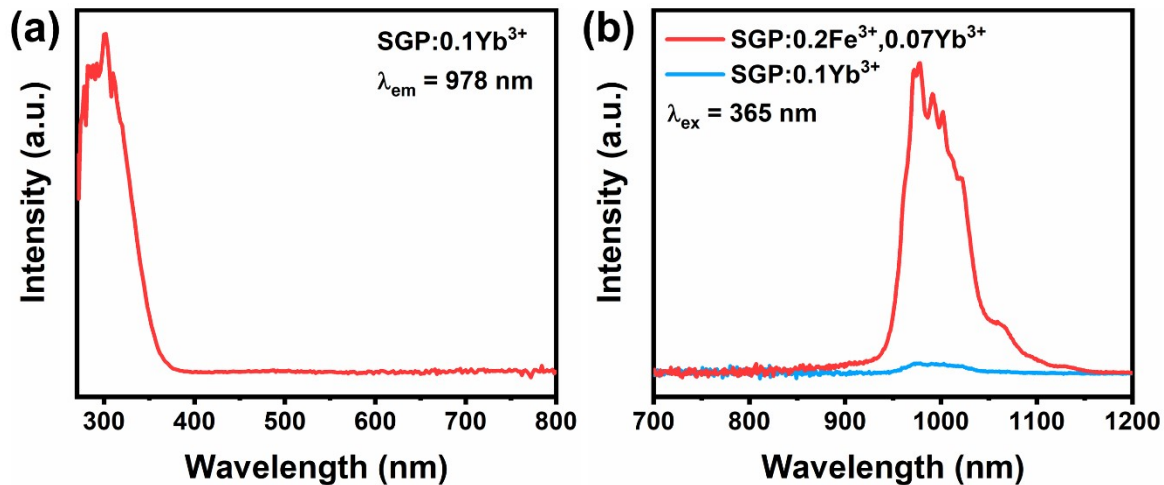

**Fig. S10** (a) PLE spectrum of SGP:0.1Yb<sup>3+</sup> monitoring at 978 nm. (b) PL spectra of SGP:0.1Yb<sup>3+</sup> and SGP:0.2Fe<sup>3+</sup>,0.07Yb<sup>3+</sup> excited by 365 nm.

The ET efficiency ( $\eta_{ET}$ ) can be calculated by the attenuation of lifetime based on the following equation:<sup>3</sup>

$$\eta_{ET} = 1 - \frac{\tau_{Fe}}{\tau_{Fe_0}} \quad (S3)$$

where  $\tau_{Fe}$  is the lifetime of Fe<sup>3+</sup> in Yb<sup>3+</sup>-doped samples, and  $\tau_{Fe_0}$  represents the lifetime of Fe<sup>3+</sup> in Yb<sup>3+</sup>-free samples.

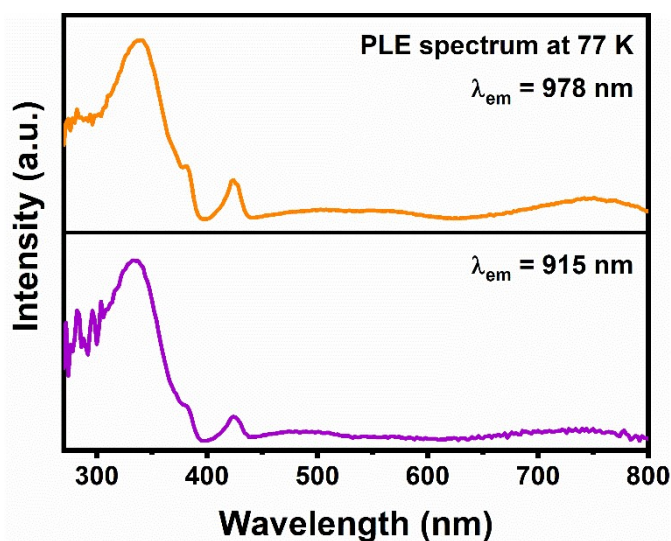

**Fig. S11** PLE spectra of SGP:0.2Fe<sup>3+</sup>,0.07Yb<sup>3+</sup> monitoring at 915 and 978 nm measured at 77 K.

## References

- 1 Q. Y. Shao, H. Ding, L. Q. Yao, J. F. Xu, C. Liang and J. Q. Jiang, Photoluminescence properties of a ScBO<sub>3</sub>:Cr<sup>3+</sup> phosphor and its applications for broadband near-infrared LEDs, *RSC Adv.*, 2018, **8**, 12035–12042.
- 2 X.-D. Wei, L.-Y. Cai, F.-C. Lu, X.-L. Chen, X.-Y. Chen and Q.-L. Liu, Structure and luminescence of Ca<sub>2</sub>Si<sub>5</sub>N<sub>8</sub>:Eu<sup>2+</sup> phosphor for warm white light-emitting diodes, *Chinese Phys. B*, 2009, **18**, 3555–3562.
- 3 P. I. Paulose, G. Jose, V. Thomas, N. V. Unnikrishnan and M. K. R. Warrier, Sensitized fluorescence of Ce<sup>3+</sup>/Mn<sup>2+</sup> system in phosphate glass, *J. Phys. Chem. Solids*, 2003, **64**, 841–846.
